# Supplementary material for: 7T ultra-high-field neuroimaging for mental health: an emerging tool for precision psychiatry?
Source: PubMed Central journal article supplement (PMC8791951; doi:10.1038/s41398-022-01787-3), 2022-01-26
Supplement: 41398_2022_1787_MOESM1_ESM.pdf [file 41398_2022_1787_MOESM1_ESM.pdf]

|                                                       | Global Efficiency_pre |
|-------------------------------------------------------|-----------------------|
| 'Frontal Pole Right'                                  | 0,344                 |
| 'Frontal Pole Left'                                   | NaN                   |
| 'Insular Cortex Right'                                | 0,366                 |
| 'Insular Cortex Left'                                 | 0,330                 |
| 'Superior Frontal Gyrus Right'                        | 0,293                 |
| 'Superior Frontal Gyrus Left'                         | 0,341                 |
| 'Middle Frontal Gyrus Right'                          | 0,265                 |
| 'Middle Frontal Gyrus Left'                           | 0,250                 |
| 'Inferior Frontal Gyrus pars triangularis Right'      | 0,246                 |
| 'Inferior Frontal Gyrus pars triangularis Left'       | 0,328                 |
| 'Inferior Frontal Gyrus pars opercularis Right'       | 0,284                 |
| 'Inferior Frontal Gyrus pars opercularis Left'        | 0,377                 |
| 'Precentral Gyrus Right'                              | 0,353                 |
| 'Precentral Gyrus Left'                               | 0,319                 |
| 'Temporal Pole Right'                                 | 0,352                 |
| 'Temporal Pole Left'                                  | 0,356                 |
| 'Superior Temporal Gyrus anterior division Right'     | 0,352                 |
| 'Superior Temporal Gyrus anterior division Left'      | 0,332                 |
| 'Superior Temporal Gyrus posterior division Right'    | 0,366                 |
| 'Superior Temporal Gyrus posterior division Left'     | 0,375                 |
| 'Middle Temporal Gyrus anterior division Right'       | 0,362                 |
| 'Middle Temporal Gyrus anterior division Left'        | 0,346                 |
| 'Middle Temporal Gyrus posterior division Right'      | 0,343                 |
| 'Middle Temporal Gyrus posterior division Left'       | 0,445                 |
| 'Middle Temporal Gyrus temporooccipital part Right'   | 0,225                 |
| 'Middle Temporal Gyrus temporooccipital part Left'    | 0,397                 |
| 'Inferior Temporal Gyrus anterior division Right'     | 0,290                 |
| 'Inferior Temporal Gyrus anterior division Left'      | 0,269                 |
| 'Inferior Temporal Gyrus posterior division Right'    | 0,268                 |
| 'Inferior Temporal Gyrus posterior division Left'     | 0,386                 |
| 'Inferior Temporal Gyrus temporooccipital part Right' | NaN                   |
| 'Inferior Temporal Gyrus temporooccipital part Left'  | 0,445                 |
| 'Postcentral Gyrus Right'                             | 0,309                 |
| 'Postcentral Gyrus Left'                              | 0,290                 |
| 'Superior Parietal Lobule Right'                      | 0,351                 |
| 'Superior Parietal Lobule Left'                       | 0,298                 |
| 'Supramarginal Gyrus anterior division Right'         | 0,330                 |
| 'Supramarginal Gyrus anterior division Left'          | 0,234                 |
| 'Supramarginal Gyrus posterior division Right'        | 0,262                 |
| 'Supramarginal Gyrus posterior division Left'         | 0,340                 |
| 'Angular Gyrus Right'                                 | 0,303                 |
| 'Angular Gyrus Left'                                  | 0,339                 |
| 'Lateral Occipital Cortex superior division Right'    | 0,302                 |
| 'Lateral Occipital Cortex superior division Left'     | 0,429                 |
| 'Lateral Occipital Cortex inferior division Right'    | 0,364                 |
| 'Lateral Occipital Cortex inferior division Left'     | 0,463                 |
| 'Intracalcarine Cortex Right'                         | 0,302                 |
| 'Intracalcarine Cortex Left'                          | 0,356                 |
| 'Frontal Medial Cortex'                               | 0,296                 |
| 'Supplementary Motor Cortex- Right'                   | 0,354                 |
| 'Supplementary Motor Cortex- Left'                    | 0,364                 |
| 'Subcallosal Cortex'                                  | 0,304                 |

## Patient 1

|                                                     |       |
|-----------------------------------------------------|-------|
| 'Paracingulate Gyrus Right'                         | 0,372 |
| 'Paracingulate Gyrus Left'                          | 0,330 |
| 'Anterior Cingulate Gyrus'                          | 0,433 |
| 'Posterior Cingulate Gyrus'                         | 0,358 |
| 'Precuneus Cortex'                                  | 0,353 |
| 'Cuneal Cortex Right'                               | 0,281 |
| 'Cuneal Cortex Left'                                | 0,281 |
| 'Frontal Orbital Cortex Right'                      | 0,351 |
| 'Frontal Orbital Cortex Left'                       | 0,328 |
| 'Parahippocampal Gyrus anterior division Right'     | 0,394 |
| 'Parahippocampal Gyrus anterior division Left'      | 0,388 |
| 'Parahippocampal Gyrus posterior division Right'    | 0,351 |
| 'Parahippocampal Gyrus posterior division Left'     | 0,439 |
| 'Lingual Gyrus Right'                               | 0,418 |
| 'Lingual Gyrus Left'                                | 0,454 |
| 'Temporal Fusiform Cortex anterior division Right'  | 0,306 |
| 'Temporal Fusiform Cortex anterior division Left'   | 0,384 |
| 'Temporal Fusiform Cortex posterior division Right' | 0,387 |
| 'Temporal Fusiform Cortex posterior division Left'  | 0,421 |
| 'Temporal Occipital Fusiform Cortex Right'          | 0,414 |
| 'Temporal Occipital Fusiform Cortex Left'           | 0,455 |
| 'Occipital Fusiform Gyrus Right'                    | 0,370 |
| 'Occipital Fusiform Gyrus Left'                     | 0,425 |
| 'Frontal Operculum Cortex Right'                    | 0,319 |
| 'Frontal Operculum Cortex Left'                     | 0,324 |
| 'Central Opercular Cortex Right'                    | 0,365 |
| 'Central Opercular Cortex Left'                     | 0,318 |
| 'Parietal Operculum Cortex Right'                   | 0,321 |
| 'Parietal Operculum Cortex Left'                    | 0,295 |
| 'Planum Polare Right'                               | 0,370 |
| 'Planum Polare Left'                                | 0,330 |
| 'Heschl"s Gyrus Right'                              | 0,342 |
| 'Heschl"s Gyrus Left'                               | 0,346 |
| 'Planum Temporale Right'                            | 0,369 |
| 'Planum Temporale Left'                             | 0,370 |
| 'Supracalcarine Cortex Right'                       | 0,287 |
| 'Supracalcarine Cortex Left'                        | 0,287 |
| 'Occipital Pole Right'                              | 0,350 |
| 'Occipital Pole Left'                               | 0,437 |
| 'Thalamus Right'                                    | 0,008 |
| 'Thalamus Left'                                     | 0,008 |
| 'Caudate Right'                                     | 0,303 |
| 'Caudate Left'                                      | 0,395 |
| 'Putamen Right'                                     | 0,397 |
| 'Putamen Left'                                      | 0,412 |
| 'Pallidum Right'                                    | 0,436 |
| 'Pallidum Left'                                     | 0,372 |
| 'Hippocampus Right'                                 | 0,324 |
| 'Hippocampus Left'                                  | 0,342 |
| 'Amygdala Right'                                    | 0,284 |
| 'Amygdala Left'                                     | 0,337 |
| 'Accumbens Right'                                   | 0,248 |
| 'Accumbens Left'                                    | 0,348 |

## Patient 1

|                                   |       |
|-----------------------------------|-------|
| 'Brain-Stem'                      | 0,320 |
| 'Cerebellar Crus1 Left'           | 0,444 |
| 'Cerebellar Crus1 Right'          | 0,410 |
| 'Cerebellar Crus2 Left'           | 0,453 |
| 'Cerebellar Crus2 Right'          | 0,454 |
| 'Cerebellar Lobule 3 Left'        | 0,346 |
| 'Cerebellar Lobule 3 Right'       | 0,279 |
| 'Cerebellar Lobule 4 and 5 Left'  | 0,422 |
| 'Cerebellar Lobule 4 and 5 Right' | 0,347 |
| 'Cerebellar Lobule 6 Left'        | 0,494 |
| 'Cerebellar Lobule 6 Right'       | 0,373 |
| 'Cerebellar Lobule 7b Left'       | 0,389 |
| 'Cerebellar Lobule 7b Right'      | 0,322 |
| 'Cerebellar Lobule 8 Left'        | 0,422 |
| 'Cerebellar Lobule 8 Right'       | 0,365 |
| 'Cerebellar Lobule 9 Left'        | 0,421 |
| 'Cerebellar Lobule 9 Right'       | 0,403 |
| 'Cerebellar Lobule 10 Left'       | 0,008 |
| 'Cerebellar Lobule 10 Right'      | 0,008 |
| 'Vermal Lobule 1 and 2'           | 0,360 |
| 'Vermal Lobule 3'                 | 0,332 |
| 'Vermal Lobule 4 and 5'           | 0,426 |
| 'Vermal Lobule 6'                 | 0,443 |
| 'Vermal Lobule 7'                 | 0,459 |
| 'Vermal Lobule 8'                 | 0,406 |
| 'Vermal Lobule 9'                 | 0,408 |
| 'Vermal Lobule 10'                | 0,401 |

Patient 1

| <u>Local Efficiency_pre</u> | <u>Betweenness Centrality_pre</u> | <u>Average Path Length_pre</u> | <u>Clustering coefficient_pre</u> |
|-----------------------------|-----------------------------------|--------------------------------|-----------------------------------|
| 0,167                       | 0,023                             | 3,064                          | 0,167                             |
| NaN                         | NaN                               | NaN                            | NaN                               |
| 0,897                       | 0,020                             | 3,160                          | 0,795                             |
| 0,536                       | 0,016                             | 3,384                          | 0,357                             |
| 0,600                       | 0,003                             | 3,776                          | 0,600                             |
| 0,633                       | 0,015                             | 3,208                          | 0,600                             |
| 0,833                       | 0,000                             | 4,144                          | 0,667                             |
| 1,000                       | NaN                               | 4,224                          | 1,000                             |
| NaN                         | 0,000                             | 4,472                          | NaN                               |
| 1,000                       | NaN                               | 3,216                          | 1,000                             |
| 0,500                       | 0,005                             | 3,984                          | 0,500                             |
| 0,718                       | 0,015                             | 2,912                          | 0,472                             |
| 0,537                       | 0,051                             | 3,312                          | 0,364                             |
| 0,267                       | 0,030                             | 3,448                          | 0,267                             |
| 0,841                       | 0,008                             | 3,480                          | 0,686                             |
| 0,602                       | 0,018                             | 3,064                          | 0,357                             |
| 0,865                       | 0,006                             | 3,480                          | 0,733                             |
| 0,800                       | 0,005                             | 3,208                          | 0,600                             |
| 0,897                       | 0,020                             | 3,160                          | 0,795                             |
| 0,651                       | 0,026                             | 3,000                          | 0,429                             |
| 0,738                       | 0,028                             | 3,392                          | 0,610                             |
| 0,478                       | 0,021                             | 3,216                          | 0,333                             |
| 0,897                       | 0,003                             | 3,504                          | 0,795                             |
| 0,713                       | 0,036                             | 2,624                          | 0,456                             |
| 1,000                       | NaN                               | 4,632                          | 1,000                             |
| 0,785                       | 0,007                             | 2,848                          | 0,578                             |
| 0,333                       | 0,002                             | 3,664                          | 0,333                             |
| NaN                         | NaN                               | 3,864                          | NaN                               |
| 0,833                       | 0,003                             | 3,992                          | 0,667                             |
| 0,536                       | 0,023                             | 2,872                          | 0,357                             |
| NaN                         | NaN                               | NaN                            | NaN                               |
| 0,752                       | 0,040                             | 2,600                          | 0,522                             |
| 0,869                       | 0,004                             | 3,776                          | 0,750                             |
| 0,333                       | 0,007                             | 3,752                          | 0,333                             |
| 0,452                       | 0,044                             | 3,144                          | 0,250                             |
| NaN                         | 0,008                             | 3,496                          | NaN                               |
| 0,922                       | 0,002                             | 3,544                          | 0,844                             |
| NaN                         | NaN                               | 4,440                          | NaN                               |
| 1,000                       | NaN                               | 3,992                          | 1,000                             |
| 0,350                       | 0,006                             | 3,184                          | 0,300                             |
| 0,733                       | 0,005                             | 3,608                          | 0,500                             |
| 0,750                       | 0,003                             | 3,192                          | 0,500                             |
| 0,717                       | 0,008                             | 3,672                          | 0,500                             |
| 0,697                       | 0,035                             | 2,608                          | 0,436                             |
| 0,843                       | 0,001                             | 3,176                          | 0,694                             |
| 0,701                       | 0,066                             | 2,472                          | 0,433                             |
| 0,500                       | 0,003                             | 3,752                          | 0,500                             |
| 0,403                       | 0,032                             | 3,320                          | 0,361                             |
| 0,667                       | 0,013                             | 3,648                          | 0,400                             |
| 0,522                       | 0,027                             | 3,088                          | 0,400                             |
| 0,800                       | 0,005                             | 2,912                          | 0,600                             |
| 1,000                       | NaN                               | 3,448                          | 1,000                             |

Patient 1

|       |       |       |       |
|-------|-------|-------|-------|
| 0,588 | 0,041 | 3,024 | 0,309 |
| 0,833 | 0,006 | 3,320 | 0,667 |
| 0,500 | 0,101 | 2,584 | 0,238 |
| 0,565 | 0,022 | 3,120 | 0,389 |
| 0,470 | 0,040 | 3,128 | 0,286 |
| 0,500 | 0,017 | 3,840 | 0,500 |
| 0,917 | 0,002 | 3,888 | 0,833 |
| 0,797 | 0,017 | 3,464 | 0,736 |
| 0,650 | 0,012 | 3,320 | 0,400 |
| 0,352 | 0,040 | 2,784 | 0,194 |
| 0,641 | 0,052 | 2,856 | 0,378 |
| 0,533 | 0,014 | 3,176 | 0,400 |
| 0,716 | 0,025 | 2,808 | 0,471 |
| 0,804 | 0,006 | 2,944 | 0,608 |
| 0,754 | 0,017 | 2,736 | 0,510 |
| 0,333 | 0,002 | 3,480 | 0,333 |
| 0,584 | 0,039 | 2,872 | 0,311 |
| 0,411 | 0,030 | 2,872 | 0,357 |
| 0,781 | 0,013 | 2,776 | 0,571 |
| 0,748 | 0,010 | 2,984 | 0,503 |
| 0,744 | 0,024 | 2,728 | 0,493 |
| 0,882 | 0,000 | 3,176 | 0,764 |
| 0,794 | 0,007 | 2,792 | 0,588 |
| 0,800 | 0,010 | 3,744 | 0,782 |
| 0,478 | 0,023 | 3,512 | 0,333 |
| 0,852 | 0,013 | 3,256 | 0,703 |
| 0,800 | 0,003 | 3,400 | 0,600 |
| 0,917 | 0,001 | 3,624 | 0,833 |
| 0,333 | 0,003 | 3,648 | 0,333 |
| 0,879 | 0,023 | 3,152 | 0,758 |
| 0,762 | 0,004 | 3,320 | 0,524 |
| 0,897 | 0,004 | 3,528 | 0,795 |
| 0,400 | 0,013 | 3,152 | 0,333 |
| 0,844 | 0,018 | 3,248 | 0,695 |
| 0,379 | 0,040 | 3,064 | 0,222 |
| 0,850 | 0,003 | 3,864 | 0,700 |
| 0,850 | 0,003 | 3,864 | 0,700 |
| 0,783 | 0,001 | 3,152 | 0,600 |
| 0,730 | 0,037 | 2,664 | 0,478 |
| NaN   | NaN   | 1,000 | NaN   |
| NaN   | NaN   | 1,000 | NaN   |
| NaN   | 0,001 | 3,408 | NaN   |
| 0,125 | 0,077 | 2,712 | 0,107 |
| 0,446 | 0,085 | 2,744 | 0,429 |
| 0,620 | 0,059 | 2,640 | 0,345 |
| 0,481 | 0,059 | 2,544 | 0,264 |
| 0,786 | 0,011 | 2,864 | 0,571 |
| 1,000 | NaN   | 3,464 | 1,000 |
| 0,833 | 0,004 | 3,416 | 0,667 |
| 1,000 | NaN   | 3,656 | 1,000 |
| 0,778 | 0,005 | 3,192 | 0,600 |
| NaN   | NaN   | 4,192 | NaN   |
| 0,518 | 0,027 | 3,200 | 0,357 |

Patient 1

|       |       |       |       |
|-------|-------|-------|-------|
| 0,722 | 0,001 | 3,464 | 0,500 |
| 0,779 | 0,009 | 2,736 | 0,558 |
| 0,648 | 0,050 | 2,832 | 0,560 |
| 0,774 | 0,011 | 2,712 | 0,547 |
| 0,720 | 0,021 | 2,696 | 0,460 |
| 0,476 | 0,005 | 3,368 | 0,429 |
| 0,833 | 0,000 | 4,064 | 0,667 |
| 0,645 | 0,024 | 2,920 | 0,404 |
| 0,900 | 0,001 | 3,240 | 0,800 |
| 0,694 | 0,066 | 2,528 | 0,419 |
| 0,871 | 0,000 | 3,168 | 0,742 |
| 0,827 | 0,004 | 3,072 | 0,654 |
| 0,333 | 0,008 | 3,288 | 0,333 |
| 0,795 | 0,010 | 2,872 | 0,595 |
| 0,722 | 0,011 | 3,136 | 0,667 |
| 0,829 | 0,003 | 2,960 | 0,658 |
| 0,816 | 0,004 | 3,064 | 0,632 |
| NaN   | NaN   | 1,000 | NaN   |
| NaN   | NaN   | 1,000 | NaN   |
| 0,756 | 0,006 | 3,336 | 0,561 |
| 0,802 | 0,002 | 3,488 | 0,619 |
| 0,732 | 0,046 | 2,768 | 0,581 |
| 0,776 | 0,016 | 2,736 | 0,562 |
| 0,774 | 0,013 | 2,720 | 0,551 |
| 0,859 | 0,002 | 3,064 | 0,719 |
| 0,817 | 0,006 | 2,912 | 0,633 |
| 0,786 | 0,010 | 2,992 | 0,583 |

## Patient 1

| Degree_pre | Global Efficiency_pre | Local Efficiency_post | Betweenness Centrality_pre |
|------------|-----------------------|-----------------------|----------------------------|
| 4,000      | NaN                   | NaN                   | NaN                        |
| NaN        | NaN                   | NaN                   | NaN                        |
| 13,000     | 0,471                 | 0,787                 | 0,021                      |
| 8,000      | 0,370                 | 0,233                 | 0,028                      |
| 5,000      | 0,325                 | 0,800                 | 0,002                      |
| 6,000      | 0,339                 | 0,658                 | 0,019                      |
| 3,000      | 0,336                 | 1,000                 | NaN                        |
| 2,000      | 0,228                 | NaN                   | NaN                        |
| 2,000      | 0,364                 | 0,786                 | 0,004                      |
| 4,000      | 0,316                 | 0,540                 | 0,024                      |
| 4,000      | 0,425                 | 0,757                 | 0,014                      |
| 9,000      | 0,291                 | 0,850                 | 0,005                      |
| 11,000     | 0,447                 | 0,712                 | 0,034                      |
| 6,000      | 0,310                 | 0,400                 | 0,020                      |
| 15,000     | 0,454                 | 0,753                 | 0,018                      |
| 8,000      | 0,422                 | 0,570                 | 0,040                      |
| 15,000     | 0,444                 | 0,845                 | 0,005                      |
| 5,000      | 0,363                 | 0,750                 | 0,002                      |
| 13,000     | 0,402                 | 0,686                 | 0,020                      |
| 7,000      | 0,361                 | 0,661                 | 0,011                      |
| 15,000     | 0,425                 | 0,864                 | 0,004                      |
| 6,000      | 0,420                 | 0,730                 | 0,021                      |
| 13,000     | 0,402                 | 0,871                 | 0,009                      |
| 17,000     | 0,359                 | 0,389                 | 0,014                      |
| 2,000      | 0,224                 | NaN                   | NaN                        |
| 10,000     | 0,350                 | 0,433                 | 0,017                      |
| 3,000      | 0,309                 | 1,000                 | NaN                        |
| 1,000      | 0,373                 | 0,286                 | 0,018                      |
| 3,000      | 0,299                 | 0,333                 | 0,014                      |
| 8,000      | 0,318                 | 0,417                 | 0,005                      |
| NaN        | 0,426                 | 0,676                 | 0,039                      |
| 17,000     | 0,397                 | 0,527                 | 0,033                      |
| 8,000      | 0,450                 | 0,652                 | 0,055                      |
| 4,000      | 0,346                 | 0,400                 | 0,041                      |
| 8,000      | 0,301                 | 1,000                 | NaN                        |
| 2,000      | NaN                   | NaN                   | NaN                        |
| 10,000     | 0,446                 | 0,748                 | 0,020                      |
| 1,000      | 0,335                 | 0,405                 | 0,048                      |
| 2,000      | 0,357                 | 0,821                 | 0,002                      |
| 5,000      | 0,247                 | NaN                   | 0,014                      |
| 5,000      | NaN                   | NaN                   | NaN                        |
| 5,000      | 0,195                 | NaN                   | NaN                        |
| 5,000      | 0,352                 | 0,133                 | 0,034                      |
| 13,000     | 0,339                 | 0,167                 | 0,007                      |
| 9,000      | 0,360                 | 0,850                 | 0,005                      |
| 19,000     | 0,346                 | 0,400                 | 0,008                      |
| 4,000      | 0,321                 | 0,900                 | 0,002                      |
| 9,000      | 0,348                 | 0,601                 | 0,024                      |
| 5,000      | 0,409                 | 0,470                 | 0,083                      |
| 6,000      | 0,315                 | 0,333                 | 0,010                      |
| 5,000      | 0,269                 | 0,833                 | 0,000                      |
| 2,000      | 0,230                 | NaN                   | NaN                        |

Patient 1

|        |       |       |       |
|--------|-------|-------|-------|
| 11,000 | 0,321 | 0,756 | 0,009 |
| 6,000  | 0,261 | 1,000 | NaN   |
| 15,000 | 0,315 | 0,500 | 0,021 |
| 9,000  | 0,267 | 0,333 | 0,006 |
| 8,000  | 0,277 | 0,750 | 0,005 |
| 4,000  | 0,277 | 0,750 | 0,005 |
| 4,000  | 0,270 | 0,333 | 0,007 |
| 14,000 | 0,458 | 0,818 | 0,011 |
| 6,000  | 0,363 | 0,642 | 0,008 |
| 9,000  | 0,383 | 0,658 | 0,013 |
| 10,000 | 0,406 | 0,641 | 0,023 |
| 6,000  | 0,395 | 0,735 | 0,009 |
| 21,000 | 0,418 | 0,813 | 0,009 |
| 18,000 | 0,392 | 0,646 | 0,024 |
| 25,000 | 0,343 | 0,833 | 0,004 |
| 3,000  | 0,344 | 0,833 | 0,001 |
| 10,000 | 0,368 | 0,300 | 0,035 |
| 8,000  | 0,408 | 0,567 | 0,040 |
| 15,000 | 0,430 | 0,742 | 0,030 |
| 18,000 | 0,432 | 0,770 | 0,017 |
| 25,000 | 0,389 | 0,773 | 0,020 |
| 11,000 | 0,353 | 0,583 | 0,004 |
| 18,000 | 0,308 | NaN   | 0,000 |
| 11,000 | 0,409 | 0,850 | 0,007 |
| 6,000  | 0,235 | 1,000 | NaN   |
| 14,000 | 0,443 | 0,773 | 0,034 |
| 5,000  | 0,277 | 0,333 | 0,006 |
| 9,000  | 0,362 | 0,333 | 0,022 |
| 3,000  | 0,392 | 0,286 | 0,044 |
| 14,000 | 0,447 | 0,797 | 0,012 |
| 7,000  | 0,377 | 0,374 | 0,021 |
| 13,000 | 0,424 | 0,893 | 0,003 |
| 6,000  | 0,237 | 1,000 | NaN   |
| 15,000 | 0,418 | 0,843 | 0,013 |
| 10,000 | 0,303 | 0,400 | 0,013 |
| 5,000  | 0,313 | 0,867 | 0,004 |
| 5,000  | 0,285 | 0,333 | 0,010 |
| 5,000  | 0,421 | 0,495 | 0,051 |
| 17,000 | 0,378 | 0,722 | 0,007 |
| 1,000  | 0,442 | 0,789 | 0,022 |
| 1,000  | 0,450 | 0,682 | 0,048 |
| 2,000  | 0,255 | NaN   | NaN   |
| 8,000  | 0,344 | 0,600 | 0,016 |
| 8,000  | 0,475 | 0,767 | 0,036 |
| 11,000 | 0,384 | 0,518 | 0,014 |
| 14,000 | 0,438 | 0,757 | 0,019 |
| 7,000  | 0,360 | 0,476 | 0,029 |
| 5,000  | 0,319 | NaN   | 0,005 |
| 9,000  | 0,322 | 0,167 | 0,016 |
| 2,000  | 0,206 | NaN   | NaN   |
| 6,000  | 0,265 | NaN   | 0,014 |
| 1,000  | 0,329 | 0,917 | 0,000 |
| 8,000  | 0,421 | 0,756 | 0,016 |

Patient 1

|        |       |       |       |
|--------|-------|-------|-------|
| 4,000  | 0,352 | 0,804 | 0,002 |
| 22,000 | 0,415 | 0,798 | 0,007 |
| 14,000 | 0,414 | 0,658 | 0,030 |
| 24,000 | 0,437 | 0,771 | 0,015 |
| 24,000 | 0,421 | 0,722 | 0,016 |
| 7,000  | 0,239 | NaN   | NaN   |
| 4,000  | NaN   | NaN   | NaN   |
| 19,000 | 0,328 | 0,300 | 0,018 |
| 6,000  | 0,362 | 0,643 | 0,008 |
| 31,000 | 0,440 | 0,731 | 0,037 |
| 12,000 | 0,427 | 0,706 | 0,027 |
| 13,000 | 0,406 | 0,792 | 0,006 |
| 3,000  | 0,353 | 0,600 | 0,002 |
| 18,000 | 0,425 | 0,790 | 0,015 |
| 9,000  | 0,442 | 0,514 | 0,070 |
| 20,000 | 0,415 | 0,763 | 0,013 |
| 17,000 | 0,434 | 0,772 | 0,016 |
| 1,000  | 0,301 | 1,000 | NaN   |
| 1,000  | NaN   | NaN   | NaN   |
| 12,000 | 0,258 | NaN   | NaN   |
| 7,000  | NaN   | NaN   | NaN   |
| 17,000 | 0,347 | 0,267 | 0,031 |
| 21,000 | 0,386 | 0,624 | 0,022 |
| 26,000 | 0,427 | 0,819 | 0,012 |
| 18,000 | 0,438 | 0,753 | 0,026 |
| 16,000 | 0,371 | 0,694 | 0,015 |
| 16,000 | 0,371 | 0,642 | 0,019 |

Patient 1

verage Path Length\_po ustering coefficient\_po Degree\_post

|       |       |        |
|-------|-------|--------|
| NaN   | NaN   | NaN    |
| NaN   | NaN   | NaN    |
| 2,492 | 0,576 | 24,000 |
| 2,863 | 0,200 | 6,000  |
| 3,290 | 0,600 | 5,000  |
| 3,250 | 0,393 | 8,000  |
| 3,226 | 1,000 | 4,000  |
| 4,524 | NaN   | 1,000  |
| 3,000 | 0,571 | 7,000  |
| 3,484 | 0,381 | 7,000  |
| 2,685 | 0,525 | 16,000 |
| 3,726 | 0,700 | 5,000  |
| 2,629 | 0,529 | 21,000 |
| 3,532 | 0,400 | 6,000  |
| 2,613 | 0,549 | 23,000 |
| 2,685 | 0,429 | 15,000 |
| 2,645 | 0,690 | 21,000 |
| 3,065 | 0,536 | 8,000  |
| 2,774 | 0,455 | 12,000 |
| 3,073 | 0,429 | 8,000  |
| 2,726 | 0,728 | 17,000 |
| 2,718 | 0,514 | 15,000 |
| 2,903 | 0,743 | 15,000 |
| 3,056 | 0,286 | 7,000  |
| 4,605 | NaN   | 1,000  |
| 3,048 | 0,300 | 5,000  |
| 3,427 | 1,000 | 2,000  |
| 2,887 | 0,238 | 7,000  |
| 3,613 | 0,333 | 3,000  |
| 3,331 | 0,333 | 4,000  |
| 2,613 | 0,615 | 14,000 |
| 2,774 | 0,527 | 11,000 |
| 2,637 | 0,485 | 22,000 |
| 3,185 | 0,400 | 6,000  |
| 3,484 | 1,000 | 2,000  |
| NaN   | NaN   | NaN    |
| 2,669 | 0,519 | 22,000 |
| 3,250 | 0,333 | 7,000  |
| 3,153 | 0,643 | 8,000  |
| 4,226 | NaN   | 2,000  |
| NaN   | NaN   | NaN    |
| 5,218 | NaN   | 1,000  |
| 3,081 | 0,133 | 6,000  |
| 3,121 | 0,167 | 4,000  |
| 2,992 | 0,700 | 5,000  |
| 3,153 | 0,400 | 6,000  |
| 3,435 | 0,800 | 6,000  |
| 3,250 | 0,464 | 8,000  |
| 2,718 | 0,273 | 11,000 |
| 3,427 | 0,333 | 3,000  |
| 3,984 | 0,667 | 3,000  |
| 4,508 | NaN   | 1,000  |

Patient 1

|       |       |        |
|-------|-------|--------|
| 3,411 | 0,533 | 6,000  |
| 4,081 | 1,000 | 3,000  |
| 3,516 | 0,333 | 7,000  |
| 3,976 | 0,333 | 3,000  |
| 3,871 | 0,500 | 4,000  |
| 3,871 | 0,500 | 4,000  |
| 4,000 | 0,333 | 3,000  |
| 2,565 | 0,636 | 22,000 |
| 2,935 | 0,400 | 5,000  |
| 2,879 | 0,393 | 8,000  |
| 2,742 | 0,364 | 11,000 |
| 2,871 | 0,500 | 12,000 |
| 2,750 | 0,625 | 16,000 |
| 2,903 | 0,379 | 12,000 |
| 3,258 | 0,667 | 7,000  |
| 3,113 | 0,667 | 4,000  |
| 2,952 | 0,200 | 6,000  |
| 2,758 | 0,318 | 12,000 |
| 2,645 | 0,533 | 16,000 |
| 2,685 | 0,549 | 18,000 |
| 2,919 | 0,712 | 12,000 |
| 3,218 | 0,429 | 8,000  |
| 3,508 | NaN   | 3,000  |
| 2,790 | 0,714 | 14,000 |
| 4,468 | 1,000 | 2,000  |
| 2,645 | 0,568 | 20,000 |
| 3,863 | 0,333 | 3,000  |
| 3,048 | 0,333 | 7,000  |
| 2,742 | 0,238 | 7,000  |
| 2,653 | 0,602 | 22,000 |
| 3,016 | 0,244 | 10,000 |
| 2,710 | 0,787 | 17,000 |
| 4,444 | 1,000 | 2,000  |
| 2,702 | 0,705 | 15,000 |
| 3,605 | 0,400 | 5,000  |
| 3,548 | 0,733 | 6,000  |
| 3,758 | 0,333 | 3,000  |
| 2,669 | 0,308 | 13,000 |
| 2,992 | 0,467 | 10,000 |
| 2,661 | 0,579 | 20,000 |
| 2,516 | 0,484 | 18,000 |
| 4,016 | NaN   | 1,000  |
| 3,145 | 0,600 | 5,000  |
| 2,476 | 0,547 | 25,000 |
| 2,839 | 0,500 | 8,000  |
| 2,694 | 0,537 | 20,000 |
| 3,024 | 0,476 | 7,000  |
| 3,242 | NaN   | 2,000  |
| 3,315 | 0,167 | 4,000  |
| 4,919 | NaN   | 1,000  |
| 3,927 | NaN   | 2,000  |
| 3,266 | 0,833 | 4,000  |
| 2,710 | 0,533 | 15,000 |

Patient 1

|       |       |        |
|-------|-------|--------|
| 3,161 | 0,643 | 8,000  |
| 2,887 | 0,596 | 19,000 |
| 2,815 | 0,450 | 16,000 |
| 2,726 | 0,548 | 21,000 |
| 2,831 | 0,480 | 19,000 |
| 4,339 | NaN   | 1,000  |
| NaN   | NaN   | NaN    |
| 3,347 | 0,300 | 5,000  |
| 3,097 | 0,536 | 8,000  |
| 2,702 | 0,486 | 21,000 |
| 2,831 | 0,443 | 21,000 |
| 2,879 | 0,592 | 16,000 |
| 3,065 | 0,600 | 5,000  |
| 2,726 | 0,588 | 17,000 |
| 2,524 | 0,314 | 15,000 |
| 2,742 | 0,533 | 15,000 |
| 2,694 | 0,550 | 19,000 |
| 3,573 | 1,000 | 2,000  |
| NaN   | NaN   | NaN    |
| 4,048 | NaN   | 1,000  |
| NaN   | NaN   | NaN    |
| 3,097 | 0,267 | 6,000  |
| 3,065 | 0,429 | 15,000 |
| 2,702 | 0,640 | 17,000 |
| 2,629 | 0,516 | 18,000 |
| 2,935 | 0,476 | 7,000  |
| 3,056 | 0,473 | 11,000 |
