# Supplementary material for: 7T ultra-high-field neuroimaging for mental health: an emerging tool for precision psychiatry?
Source: PubMed Central journal article supplement (PMC8791951; doi:10.1038/s41398-022-01787-3), 2022-01-26
Supplement: 41398_2022_1787_MOESM2_ESM.pdf [file 41398_2022_1787_MOESM2_ESM.pdf]

|                                                       | Global Efficiency_pre | ocal Efficiency_pr |
|-------------------------------------------------------|-----------------------|--------------------|
| 'Frontal Pole Right'                                  | 0,208                 | 0,333              |
| 'Frontal Pole Left'                                   | 0,285                 | 1,000              |
| 'Insular Cortex Right'                                | 0,433                 | 0,684              |
| 'Insular Cortex Left'                                 | 0,422                 | 0,741              |
| 'Superior Frontal Gyrus Right'                        | 0,151                 | 1,000              |
| 'Superior Frontal Gyrus Left'                         | 0,357                 | 0,746              |
| 'Middle Frontal Gyrus Right'                          | 0,177                 | 0,333              |
| 'Middle Frontal Gyrus Left'                           | 0,344                 | 0,439              |
| 'Inferior Frontal Gyrus pars triangularis Right'      | NaN                   | NaN                |
| 'Inferior Frontal Gyrus pars triangularis Left'       | 0,220                 | NaN                |
| 'Inferior Frontal Gyrus pars opercularis Right'       | 0,173                 | 1,000              |
| 'Inferior Frontal Gyrus pars opercularis Left'        | 0,173                 | NaN                |
| 'Precentral Gyrus Right'                              | 0,358                 | 0,725              |
| 'Precentral Gyrus Left'                               | 0,326                 | 0,653              |
| 'Temporal Pole Right'                                 | 0,375                 | 0,791              |
| 'Temporal Pole Left'                                  | 0,373                 | 0,786              |
| 'Superior Temporal Gyrus anterior division Right'     | NaN                   | NaN                |
| 'Superior Temporal Gyrus anterior division Left'      | 0,332                 | 0,857              |
| 'Superior Temporal Gyrus posterior division Right'    | 0,306                 | 0,400              |
| 'Superior Temporal Gyrus posterior division Left'     | 0,304                 | 0,850              |
| 'Middle Temporal Gyrus anterior division Right'       | 0,265                 | 0,333              |
| 'Middle Temporal Gyrus anterior division Left'        | 0,298                 | 0,601              |
| 'Middle Temporal Gyrus posterior division Right'      | 0,254                 | 0,333              |
| 'Middle Temporal Gyrus posterior division Left'       | 0,251                 | 1,000              |
| 'Middle Temporal Gyrus temporooccipital part Right'   | 0,303                 | 0,800              |
| 'Middle Temporal Gyrus temporooccipital part Left'    | NaN                   | NaN                |
| 'Inferior Temporal Gyrus anterior division Right'     | NaN                   | NaN                |
| 'Inferior Temporal Gyrus anterior division Left'      | 0,011                 | NaN                |
| 'Inferior Temporal Gyrus posterior division Right'    | 0,212                 | 0,333              |
| 'Inferior Temporal Gyrus posterior division Left'     | 0,275                 | 0,833              |
| 'Inferior Temporal Gyrus temporooccipital part Right' | 0,264                 | 0,722              |
| 'Inferior Temporal Gyrus temporooccipital part Left'  | 0,249                 | 0,722              |
| 'Postcentral Gyrus Right'                             | 0,329                 | 0,730              |
| 'Postcentral Gyrus Left'                              | 0,380                 | 0,780              |
| 'Superior Parietal Lobule Right'                      | 0,281                 | 0,642              |
| 'Superior Parietal Lobule Left'                       | 0,203                 | 1,000              |
| 'Supramarginal Gyrus anterior division Right'         | 0,309                 | 0,730              |
| 'Supramarginal Gyrus anterior division Left'          | 0,343                 | 0,622              |
| 'Supramarginal Gyrus posterior division Right'        | 0,371                 | 0,740              |
| 'Supramarginal Gyrus posterior division Left'         | 0,241                 | 1,000              |
| 'Angular Gyrus Right'                                 | 0,181                 | 0,333              |
| 'Angular Gyrus Left'                                  | 0,353                 | 0,686              |
| 'Lateral Occipital Cortex superior division Right'    | 0,261                 | 0,833              |
| 'Lateral Occipital Cortex superior division Left'     | 0,266                 | 0,167              |
| 'Lateral Occipital Cortex inferior division Right'    | 0,241                 | NaN                |
| 'Lateral Occipital Cortex inferior division Left'     | 0,198                 | NaN                |
| 'Intracalcarine Cortex Right'                         | 0,294                 | 0,533              |
| 'Intracalcarine Cortex Left'                          | 0,264                 | 0,683              |
| 'Frontal Medial Cortex'                               | 0,286                 | 0,429              |
| 'Supplementary Motor Cortex- Right'                   | 0,307                 | 0,587              |
| 'Supplementary Motor Cortex- Left'                    | 0,247                 | 1,000              |
| 'Subcallosal Cortex'                                  | 0,261                 | 1,000              |

## Patient 2

|                                                     |       |       |
|-----------------------------------------------------|-------|-------|
| 'Paracingulate Gyrus Right'                         | 0,292 | 0,750 |
| 'Paracingulate Gyrus Left'                          | 0,330 | 0,690 |
| 'Anterior Cingulate Gyrus'                          | 0,241 | 1,000 |
| 'Posterior Cingulate Gyrus'                         | 0,369 | 0,544 |
| 'Precuneus Cortex'                                  | 0,261 | 0,833 |
| 'Cuneal Cortex Right'                               | 0,230 | 0,833 |
| 'Cuneal Cortex Left'                                | 0,205 | 0,833 |
| 'Frontal Orbital Cortex Right'                      | 0,322 | 0,732 |
| 'Frontal Orbital Cortex Left'                       | 0,178 | NaN   |
| 'Parahippocampal Gyrus anterior division Right'     | NaN   | NaN   |
| 'Parahippocampal Gyrus anterior division Left'      | 0,136 | NaN   |
| 'Parahippocampal Gyrus posterior division Right'    | 0,207 | 0,833 |
| 'Parahippocampal Gyrus posterior division Left'     | 0,242 | 0,417 |
| 'Lingual Gyrus Right'                               | 0,249 | 1,000 |
| 'Lingual Gyrus Left'                                | 0,307 | 0,367 |
| 'Temporal Fusiform Cortex anterior division Right'  | 0,011 | NaN   |
| 'Temporal Fusiform Cortex anterior division Left'   | 0,015 | NaN   |
| 'Temporal Fusiform Cortex posterior division Right' | 0,232 | NaN   |
| 'Temporal Fusiform Cortex posterior division Left'  | 0,244 | NaN   |
| 'Temporal Occipital Fusiform Cortex Right'          | 0,310 | 0,381 |
| 'Temporal Occipital Fusiform Cortex Left'           | 0,284 | 0,333 |
| 'Occipital Fusiform Gyrus Right'                    | 0,306 | 0,500 |
| 'Occipital Fusiform Gyrus Left'                     | 0,185 | NaN   |
| 'Frontal Operculum Cortex Right'                    | 0,248 | NaN   |
| 'Frontal Operculum Cortex Left'                     | 0,147 | NaN   |
| 'Central Opercular Cortex Right'                    | 0,393 | 0,732 |
| 'Central Opercular Cortex Left'                     | 0,358 | 0,788 |
| 'Parietal Operculum Cortex Right'                   | 0,338 | 0,778 |
| 'Parietal Operculum Cortex Left'                    | 0,406 | 0,742 |
| 'Planum Polare Right'                               | 0,401 | 0,762 |
| 'Planum Polare Left'                                | 0,382 | 0,787 |
| 'Heschl"s Gyrus Right'                              | 0,344 | 0,889 |
| 'Heschl"s Gyrus Left'                               | 0,411 | 0,647 |
| 'Planum Temporale Right'                            | 0,363 | 0,793 |
| 'Planum Temporale Left'                             | 0,336 | 0,405 |
| 'Supracalcarine Cortex Right'                       | 0,230 | 0,833 |
| 'Supracalcarine Cortex Left'                        | 0,205 | 0,833 |
| 'Occipital Pole Right'                              | 0,197 | NaN   |
| 'Occipital Pole Left'                               | 0,173 | NaN   |
| 'Thalamus Right'                                    | 0,190 | NaN   |
| 'Thalamus Left'                                     | 0,244 | NaN   |
| 'Caudate Right'                                     | 0,237 | 1,000 |
| 'Caudate Left'                                      | 0,320 | 0,375 |
| 'Putamen Right'                                     | 0,348 | 0,600 |
| 'Putamen Left'                                      | 0,348 | 0,865 |
| 'Pallidum Right'                                    | NaN   | NaN   |
| 'Pallidum Left'                                     | NaN   | NaN   |
| 'Hippocampus Right'                                 | 0,262 | 0,100 |
| 'Hippocampus Left'                                  | 0,197 | NaN   |
| 'Amygdala Right'                                    | 0,197 | NaN   |
| 'Amygdala Left'                                     | 0,315 | 0,500 |
| 'Accumbens Right'                                   | 0,237 | 1,000 |
| 'Accumbens Left'                                    | 0,276 | 0,833 |

## Patient 2

|                                   |       |       |
|-----------------------------------|-------|-------|
| 'Brain-Stem'                      | 0,190 | NaN   |
| 'Cerebellar Crus1 Left'           | 0,239 | NaN   |
| 'Cerebellar Crus1 Right'          | 0,185 | NaN   |
| 'Cerebellar Crus2 Left'           | 0,173 | NaN   |
| 'Cerebellar Crus2 Right'          | 0,191 | NaN   |
| 'Cerebellar Lobule 3 Left'        | 0,258 | 0,750 |
| 'Cerebellar Lobule 3 Right'       | 0,248 | 0,417 |
| 'Cerebellar Lobule 4 and 5 Left'  | 0,299 | 0,650 |
| 'Cerebellar Lobule 4 and 5 Right' | 0,329 | 0,599 |
| 'Cerebellar Lobule 6 Left'        | 0,394 | 0,501 |
| 'Cerebellar Lobule 6 Right'       | 0,303 | 0,533 |
| 'Cerebellar Lobule 7b Left'       | 0,288 | 0,800 |
| 'Cerebellar Lobule 7b Right'      | 0,229 | NaN   |
| 'Cerebellar Lobule 8 Left'        | 0,267 | 0,900 |
| 'Cerebellar Lobule 8 Right'       | 0,305 | 0,606 |
| 'Cerebellar Lobule 9 Left'        | 0,336 | 0,676 |
| 'Cerebellar Lobule 9 Right'       | 0,274 | 0,800 |
| 'Cerebellar Lobule 10 Left'       | 0,161 | NaN   |
| 'Cerebellar Lobule 10 Right'      | 0,239 | 1,000 |
| 'Vermal Lobule 1 and 2'           | 0,190 | NaN   |
| 'Vermal Lobule 3'                 | NaN   | NaN   |
| 'Vermal Lobule 4 and 5'           | 0,303 | 0,867 |
| 'Vermal Lobule 6'                 | 0,281 | 0,833 |
| 'Vermal Lobule 7'                 | 0,142 | NaN   |
| 'Vermal Lobule 8'                 | 0,319 | 0,694 |
| 'Vermal Lobule 9'                 | 0,335 | 0,730 |
| 'Vermal Lobule 10'                | 0,293 | 0,417 |

Patient 2

| Betweenness Centrality | Average Path Length | Clustering Coefficient | Degree |
|------------------------|---------------------|------------------------|--------|
| 0,020                  | 5,208               | 0,333                  | 3,000  |
| NaN                    | 3,900               | 1,000                  | 2,000  |
| 0,084                  | 2,958               | 0,397                  | 26,000 |
| 0,057                  | 2,983               | 0,482                  | 23,000 |
| NaN                    | 7,125               | 1,000                  | 2,000  |
| 0,036                  | 3,475               | 0,500                  | 13,000 |
| 0,007                  | 6,158               | 0,333                  | 3,000  |
| 0,033                  | 3,542               | 0,273                  | 11,000 |
| NaN                    | NaN                 | NaN                    | NaN    |
| 0,041                  | 5,158               | NaN                    | 3,000  |
| NaN                    | 6,167               | 1,000                  | 2,000  |
| NaN                    | 6,150               | NaN                    | 1,000  |
| 0,010                  | 3,558               | 0,486                  | 15,000 |
| 0,011                  | 3,675               | 0,528                  | 9,000  |
| 0,014                  | 3,158               | 0,582                  | 14,000 |
| 0,013                  | 3,258               | 0,575                  | 16,000 |
| NaN                    | NaN                 | NaN                    | NaN    |
| 0,002                  | 3,408               | 0,714                  | 8,000  |
| 0,085                  | 3,542               | 0,400                  | 5,000  |
| 0,000                  | 3,600               | 0,700                  | 5,000  |
| 0,018                  | 4,100               | 0,333                  | 3,000  |
| 0,022                  | 4,117               | 0,464                  | 8,000  |
| 0,080                  | 4,275               | 0,333                  | 4,000  |
| NaN                    | 4,383               | 1,000                  | 2,000  |
| 0,005                  | 3,583               | 0,600                  | 5,000  |
| NaN                    | NaN                 | NaN                    | NaN    |
| NaN                    | NaN                 | NaN                    | NaN    |
| NaN                    | 1,500               | NaN                    | 1,000  |
| 0,034                  | 5,200               | 0,333                  | 4,000  |
| 0,002                  | 4,175               | 0,667                  | 4,000  |
| 0,011                  | 4,442               | 0,500                  | 4,000  |
| 0,003                  | 4,592               | 0,500                  | 4,000  |
| 0,008                  | 3,717               | 0,491                  | 11,000 |
| 0,013                  | 3,250               | 0,562                  | 18,000 |
| 0,001                  | 4,292               | 0,400                  | 5,000  |
| NaN                    | 5,417               | 1,000                  | 2,000  |
| 0,001                  | 3,892               | 0,476                  | 7,000  |
| 0,040                  | 3,633               | 0,379                  | 12,000 |
| 0,024                  | 3,508               | 0,507                  | 17,000 |
| NaN                    | 4,608               | 1,000                  | 2,000  |
| 0,007                  | 6,150               | 0,333                  | 4,000  |
| 0,048                  | 3,483               | 0,424                  | 12,000 |
| 0,000                  | 4,375               | 0,667                  | 3,000  |
| 0,005                  | 4,300               | 0,167                  | 4,000  |
| 0,037                  | 4,475               | NaN                    | 3,000  |
| 0,002                  | 5,400               | NaN                    | 2,000  |
| 0,050                  | 3,733               | 0,400                  | 6,000  |
| 0,026                  | 4,242               | 0,429                  | 7,000  |
| 0,057                  | 4,217               | 0,381                  | 7,000  |
| 0,003                  | 3,967               | 0,476                  | 7,000  |
| NaN                    | 4,550               | 1,000                  | 3,000  |
| NaN                    | 4,375               | 1,000                  | 3,000  |

Patient 2

|       |       |       |        |
|-------|-------|-------|--------|
| 0,004 | 4,192 | 0,536 | 8,000  |
| 0,017 | 3,625 | 0,417 | 9,000  |
| NaN   | 4,550 | 1,000 | 2,000  |
| 0,048 | 3,458 | 0,358 | 16,000 |
| 0,000 | 4,375 | 0,667 | 3,000  |
| 0,004 | 4,683 | 0,667 | 4,000  |
| 0,000 | 5,217 | 0,667 | 3,000  |
| 0,020 | 3,650 | 0,714 | 8,000  |
| 0,014 | 6,133 | NaN   | 2,000  |
| NaN   | NaN   | NaN   | NaN    |
| NaN   | 7,475 | NaN   | 1,000  |
| 0,000 | 5,300 | 0,667 | 3,000  |
| 0,005 | 4,558 | 0,333 | 4,000  |
| NaN   | 4,275 | 1,000 | 3,000  |
| 0,044 | 3,642 | 0,333 | 6,000  |
| NaN   | 1,500 | NaN   | 1,000  |
| 0,000 | 1,000 | NaN   | 2,000  |
| 0,041 | 4,550 | NaN   | 2,000  |
| 0,004 | 4,458 | NaN   | 3,000  |
| 0,100 | 3,608 | 0,286 | 7,000  |
| 0,011 | 3,742 | 0,333 | 3,000  |
| 0,021 | 3,433 | 0,500 | 4,000  |
| NaN   | 5,558 | NaN   | 1,000  |
| 0,012 | 4,300 | NaN   | 2,000  |
| NaN   | 7,125 | NaN   | 1,000  |
| 0,024 | 3,308 | 0,476 | 21,000 |
| 0,012 | 3,258 | 0,582 | 11,000 |
| 0,005 | 3,625 | 0,591 | 12,000 |
| 0,067 | 3,058 | 0,505 | 20,000 |
| 0,031 | 3,092 | 0,526 | 20,000 |
| 0,018 | 3,192 | 0,574 | 17,000 |
| 0,002 | 3,358 | 0,778 | 10,000 |
| 0,267 | 2,808 | 0,426 | 17,000 |
| 0,022 | 3,250 | 0,603 | 13,000 |
| 0,054 | 3,350 | 0,333 | 7,000  |
| 0,004 | 4,683 | 0,667 | 4,000  |
| 0,000 | 5,217 | 0,667 | 3,000  |
| 0,017 | 5,383 | NaN   | 2,000  |
| 0,006 | 6,208 | NaN   | 2,000  |
| NaN   | 5,300 | NaN   | 1,000  |
| 0,019 | 4,308 | NaN   | 3,000  |
| NaN   | 4,517 | 1,000 | 3,000  |
| 0,086 | 3,542 | 0,321 | 8,000  |
| 0,087 | 3,408 | 0,556 | 10,000 |
| 0,003 | 3,525 | 0,731 | 13,000 |
| NaN   | NaN   | NaN   | NaN    |
| NaN   | NaN   | NaN   | NaN    |
| 0,031 | 4,333 | 0,100 | 5,000  |
| NaN   | 5,325 | NaN   | 1,000  |
| NaN   | 5,325 | NaN   | 1,000  |
| 0,021 | 3,433 | 0,500 | 4,000  |
| NaN   | 4,517 | 1,000 | 3,000  |
| 0,007 | 3,975 | 0,667 | 4,000  |

Patient 2

|       |       |       |        |
|-------|-------|-------|--------|
| 0,028 | 5,508 | NaN   | 2,000  |
| 0,034 | 4,567 | NaN   | 4,000  |
| NaN   | 5,558 | NaN   | 1,000  |
| 0,016 | 6,358 | NaN   | 3,000  |
| 0,024 | 5,617 | NaN   | 2,000  |
| 0,008 | 4,375 | 0,500 | 5,000  |
| 0,018 | 4,458 | 0,333 | 4,000  |
| 0,024 | 3,725 | 0,400 | 6,000  |
| 0,059 | 3,525 | 0,333 | 10,000 |
| 0,294 | 2,900 | 0,242 | 14,000 |
| 0,046 | 3,667 | 0,400 | 6,000  |
| 0,004 | 3,892 | 0,600 | 6,000  |
| 0,037 | 4,725 | NaN   | 2,000  |
| 0,000 | 4,275 | 0,800 | 6,000  |
| 0,062 | 3,817 | 0,444 | 9,000  |
| 0,061 | 3,483 | 0,400 | 11,000 |
| 0,003 | 4,200 | 0,600 | 6,000  |
| 0,014 | 6,483 | NaN   | 2,000  |
| NaN   | 4,467 | 1,000 | 2,000  |
| NaN   | 5,450 | NaN   | 1,000  |
| NaN   | NaN   | NaN   | NaN    |
| 0,001 | 3,667 | 0,733 | 6,000  |
| 0,001 | 3,783 | 0,667 | 3,000  |
| NaN   | 7,350 | NaN   | 1,000  |
| 0,023 | 3,592 | 0,444 | 9,000  |
| 0,028 | 3,483 | 0,473 | 11,000 |
| 0,022 | 3,708 | 0,333 | 4,000  |

## Patient 2

| <u>Global Efficiency_po</u> | <u>Local Efficiency_po</u> | <u>Betweenness Centrality_po</u> | <u>Average Path Length_po</u> |
|-----------------------------|----------------------------|----------------------------------|-------------------------------|
| 0,024                       | NaN                        | 0,000                            | 2,200                         |
| 0,025                       | NaN                        | 0,000                            | 1,800                         |
| 0,392                       | 0,634                      | 0,067                            | 3,017                         |
| 0,309                       | 0,661                      | 0,014                            | 3,574                         |
| 0,281                       | 0,900                      | 0,000                            | 3,687                         |
| 0,365                       | 0,546                      | 0,053                            | 2,974                         |
| 0,025                       | NaN                        | 0,000                            | 1,800                         |
| 0,031                       | NaN                        | 0,001                            | 1,400                         |
| NaN                         | NaN                        | NaN                              | NaN                           |
| 0,018                       | NaN                        | NaN                              | 2,600                         |
| NaN                         | NaN                        | NaN                              | NaN                           |
| 0,025                       | NaN                        | 0,000                            | 1,800                         |
| 0,303                       | 0,100                      | 0,051                            | 3,461                         |
| 0,282                       | 0,333                      | 0,002                            | 3,643                         |
| 0,302                       | 0,750                      | 0,005                            | 3,626                         |
| 0,302                       | 0,750                      | 0,006                            | 3,652                         |
| 0,301                       | 0,417                      | 0,007                            | 3,435                         |
| 0,355                       | 0,808                      | 0,007                            | 3,270                         |
| 0,290                       | 0,738                      | 0,004                            | 3,783                         |
| 0,255                       | 1,000                      | NaN                              | 4,157                         |
| 0,404                       | 0,621                      | 0,065                            | 2,687                         |
| 0,349                       | 0,818                      | 0,006                            | 3,078                         |
| 0,366                       | 0,679                      | 0,022                            | 2,922                         |
| 0,365                       | 0,667                      | 0,127                            | 2,783                         |
| 0,265                       | 0,600                      | 0,010                            | 4,035                         |
| 0,319                       | 0,893                      | 0,001                            | 3,243                         |
| 0,241                       | 1,000                      | NaN                              | 4,383                         |
| 0,266                       | 0,950                      | 0,001                            | 3,948                         |
| 0,297                       | 0,881                      | 0,000                            | 3,565                         |
| 0,362                       | 0,780                      | 0,012                            | 2,965                         |
| 0,271                       | 0,833                      | 0,003                            | 3,739                         |
| 0,321                       | 0,200                      | 0,067                            | 3,139                         |
| 0,397                       | 0,661                      | 0,074                            | 2,817                         |
| 0,362                       | 0,715                      | 0,018                            | 3,261                         |
| 0,266                       | 1,000                      | NaN                              | 3,878                         |
| 0,280                       | 0,833                      | 0,002                            | 3,652                         |
| 0,373                       | 0,699                      | 0,025                            | 2,983                         |
| 0,322                       | 0,571                      | 0,052                            | 3,200                         |
| 0,368                       | 0,720                      | 0,026                            | 3,000                         |
| 0,188                       | NaN                        | NaN                              | 5,191                         |
| 0,245                       | NaN                        | 0,017                            | 4,200                         |
| 0,334                       | 0,836                      | 0,003                            | 3,183                         |
| 0,376                       | 0,725                      | 0,026                            | 2,930                         |
| 0,328                       | 0,683                      | 0,018                            | 3,078                         |
| 0,309                       | 0,357                      | 0,022                            | 3,365                         |
| 0,231                       | 0,500                      | 0,006                            | 4,583                         |
| 0,315                       | 0,852                      | 0,010                            | 3,461                         |
| 0,303                       | 0,917                      | 0,007                            | 3,574                         |
| 0,366                       | 0,666                      | 0,019                            | 3,104                         |
| 0,352                       | 0,673                      | 0,033                            | 3,096                         |
| 0,281                       | NaN                        | 0,015                            | 3,452                         |
| 0,344                       | 0,663                      | 0,028                            | 3,165                         |

Patient 2

|       |       |       |       |
|-------|-------|-------|-------|
| 0,272 | 0,333 | 0,013 | 3,739 |
| 0,248 | NaN   | NaN   | 3,965 |
| 0,204 | NaN   | NaN   | 4,730 |
| 0,347 | 0,730 | 0,021 | 3,174 |
| 0,325 | 0,522 | 0,052 | 3,165 |
| 0,290 | 0,889 | 0,003 | 3,800 |
| 0,294 | 0,436 | 0,026 | 3,861 |
| 0,323 | 0,539 | 0,036 | 3,452 |
| 0,328 | 0,609 | 0,047 | 3,226 |
| 0,192 | NaN   | NaN   | 5,278 |
| 0,263 | 1,000 | NaN   | 3,930 |
| 0,292 | 0,793 | 0,009 | 4,000 |
| 0,273 | 0,911 | 0,001 | 4,061 |
| 0,307 | 0,863 | 0,008 | 3,565 |
| 0,309 | 0,811 | 0,011 | 3,557 |
| NaN   | NaN   | NaN   | NaN   |
| 0,292 | 0,500 | 0,001 | 3,574 |
| 0,330 | 0,705 | 0,051 | 3,417 |
| 0,298 | 0,822 | 0,010 | 3,809 |
| 0,346 | 0,650 | 0,078 | 3,209 |
| 0,292 | 0,819 | 0,003 | 3,835 |
| 0,285 | 0,900 | 0,000 | 3,583 |
| 0,233 | NaN   | 0,005 | 4,200 |
| 0,319 | 0,767 | 0,003 | 3,357 |
| 0,220 | NaN   | NaN   | 4,565 |
| 0,340 | 0,689 | 0,005 | 3,339 |
| 0,381 | 0,713 | 0,046 | 2,913 |
| 0,340 | 0,822 | 0,005 | 3,200 |
| 0,304 | 0,933 | 0,002 | 3,461 |
| 0,323 | 0,571 | 0,011 | 3,409 |
| 0,337 | 0,684 | 0,019 | 3,530 |
| 0,322 | 0,810 | 0,005 | 3,496 |
| 0,335 | 0,845 | 0,003 | 3,391 |
| 0,338 | 0,711 | 0,014 | 3,496 |
| 0,342 | 0,726 | 0,028 | 3,304 |
| 0,301 | 0,844 | 0,005 | 3,652 |
| NaN   | NaN   | NaN   | NaN   |
| 0,249 | 0,850 | 0,003 | 4,252 |
| 0,247 | 0,833 | 0,003 | 4,278 |
| 0,008 | NaN   | NaN   | 1,000 |
| 0,008 | NaN   | NaN   | 1,000 |
| 0,008 | NaN   | NaN   | 1,000 |
| 0,008 | NaN   | NaN   | 1,000 |
| 0,255 | 0,300 | 0,020 | 4,261 |
| 0,277 | 0,500 | 0,028 | 3,896 |
| 0,221 | 1,000 | NaN   | 4,774 |
| 0,221 | 1,000 | NaN   | 4,774 |
| 0,291 | 0,822 | 0,004 | 3,904 |
| 0,287 | 0,405 | 0,015 | 3,739 |
| 0,008 | NaN   | NaN   | 1,000 |
| 0,008 | NaN   | NaN   | 1,000 |
| 0,258 | 1,000 | NaN   | 3,974 |
| 0,191 | NaN   | NaN   | 5,252 |

Patient 2

|       |       |       |       |
|-------|-------|-------|-------|
| 0,261 | 0,476 | 0,027 | 4,287 |
| 0,261 | NaN   | 0,018 | 3,957 |
| 0,319 | 0,508 | 0,025 | 3,191 |
| 0,263 | 0,833 | 0,004 | 4,148 |
| 0,289 | 0,643 | 0,038 | 3,678 |
| 0,292 | 0,667 | 0,022 | 4,000 |
| 0,275 | 0,811 | 0,003 | 4,235 |
| 0,277 | 0,833 | 0,003 | 4,096 |
| 0,294 | 0,476 | 0,031 | 3,670 |
| 0,338 | 0,367 | 0,061 | 3,226 |
| 0,369 | 0,449 | 0,164 | 2,887 |
| 0,273 | 0,730 | 0,012 | 3,974 |
| 0,265 | 0,833 | 0,006 | 4,035 |
| 0,275 | 0,250 | 0,034 | 3,722 |
| 0,329 | 0,167 | 0,063 | 3,009 |
| 0,296 | 0,524 | 0,022 | 3,530 |
| 0,308 | 0,524 | 0,043 | 3,339 |
| 0,192 | NaN   | NaN   | 5,278 |
| 0,243 | 1,000 | NaN   | 4,157 |
| 0,215 | 1,000 | NaN   | 4,965 |
| 0,206 | NaN   | NaN   | 4,991 |
| 0,213 | NaN   | NaN   | 4,661 |
| 0,304 | 0,856 | 0,003 | 3,539 |
| 0,286 | 0,889 | 0,003 | 3,835 |
| 0,244 | 0,333 | 0,006 | 4,183 |
| 0,249 | 0,500 | 0,007 | 4,087 |
| 0,236 | 1,000 | NaN   | 4,226 |

Patient 2

ustering coefficient\_po Degree\_post

|       |        |
|-------|--------|
| NaN   | 2,000  |
| NaN   | 2,000  |
| 0,415 | 19,000 |
| 0,571 | 8,000  |
| 0,800 | 5,000  |
| 0,333 | 13,000 |
| NaN   | 2,000  |
| NaN   | 3,000  |
| NaN   | NaN    |
| NaN   | 1,000  |
| NaN   | NaN    |
| NaN   | 2,000  |
| 0,100 | 5,000  |
| 0,333 | 3,000  |
| 0,536 | 8,000  |
| 0,536 | 8,000  |
| 0,333 | 4,000  |
| 0,615 | 14,000 |
| 0,524 | 7,000  |
| 1,000 | 4,000  |
| 0,382 | 17,000 |
| 0,636 | 12,000 |
| 0,513 | 13,000 |
| 0,556 | 9,000  |
| 0,600 | 5,000  |
| 0,786 | 8,000  |
| 1,000 | 4,000  |
| 0,900 | 5,000  |
| 0,762 | 7,000  |
| 0,564 | 13,000 |
| 0,667 | 3,000  |
| 0,200 | 5,000  |
| 0,390 | 17,000 |
| 0,467 | 16,000 |
| 1,000 | 3,000  |
| 0,667 | 4,000  |
| 0,448 | 15,000 |
| 0,429 | 7,000  |
| 0,462 | 14,000 |
| NaN   | 1,000  |
| NaN   | 3,000  |
| 0,673 | 11,000 |
| 0,467 | 15,000 |
| 0,467 | 6,000  |
| 0,286 | 7,000  |
| 0,500 | 4,000  |
| 0,711 | 10,000 |
| 0,833 | 9,000  |
| 0,390 | 15,000 |
| 0,527 | 11,000 |
| NaN   | 2,000  |
| 0,422 | 10,000 |

Patient 2

|       |        |
|-------|--------|
| 0,333 | 3,000  |
| NaN   | 1,000  |
| NaN   | 1,000  |
| 0,491 | 11,000 |
| 0,400 | 6,000  |
| 0,778 | 9,000  |
| 0,418 | 11,000 |
| 0,356 | 10,000 |
| 0,361 | 9,000  |
| NaN   | 1,000  |
| 1,000 | 3,000  |
| 0,591 | 12,000 |
| 0,821 | 8,000  |
| 0,733 | 10,000 |
| 0,644 | 10,000 |
| NaN   | NaN    |
| 0,500 | 4,000  |
| 0,439 | 12,000 |
| 0,644 | 10,000 |
| 0,372 | 13,000 |
| 0,639 | 9,000  |
| 0,800 | 5,000  |
| NaN   | 2,000  |
| 0,533 | 6,000  |
| NaN   | 1,000  |
| 0,545 | 12,000 |
| 0,457 | 15,000 |
| 0,644 | 10,000 |
| 0,867 | 6,000  |
| 0,393 | 8,000  |
| 0,436 | 13,000 |
| 0,639 | 9,000  |
| 0,691 | 11,000 |
| 0,440 | 14,000 |
| 0,474 | 13,000 |
| 0,689 | 10,000 |
| NaN   | NaN    |
| 0,700 | 5,000  |
| 0,667 | 6,000  |
| NaN   | 1,000  |
| NaN   | 1,000  |
| NaN   | 1,000  |
| NaN   | 1,000  |
| 0,300 | 5,000  |
| 0,500 | 4,000  |
| 1,000 | 3,000  |
| 1,000 | 3,000  |
| 0,644 | 10,000 |
| 0,381 | 7,000  |
| NaN   | 1,000  |
| NaN   | 1,000  |
| 1,000 | 2,000  |
| NaN   | 1,000  |

Patient 2

|       |        |
|-------|--------|
| 0,476 | 7,000  |
| NaN   | 3,000  |
| 0,333 | 7,000  |
| 0,667 | 7,000  |
| 0,571 | 7,000  |
| 0,500 | 12,000 |
| 0,622 | 10,000 |
| 0,667 | 9,000  |
| 0,476 | 7,000  |
| 0,267 | 10,000 |
| 0,288 | 12,000 |
| 0,524 | 7,000  |
| 0,667 | 6,000  |
| 0,200 | 5,000  |
| 0,167 | 4,000  |
| 0,333 | 7,000  |
| 0,333 | 7,000  |
| NaN   | 1,000  |
| 1,000 | 3,000  |
| 1,000 | 3,000  |
| NaN   | 1,000  |
| NaN   | 1,000  |
| 0,711 | 10,000 |
| 0,778 | 9,000  |
| 0,333 | 3,000  |
| 0,500 | 4,000  |
| 1,000 | 3,000  |
